# Supplementary material
Source: bioRxiv or medRxiv preprint supplement (https://medrxiv.org/highwire/filestream/76306/field_highwire_adjunct_files/1/2020.04.09.20058651-2.pdf)
Supplement: Supplementary file [file 2020.04.09.20058651-2.pdf]

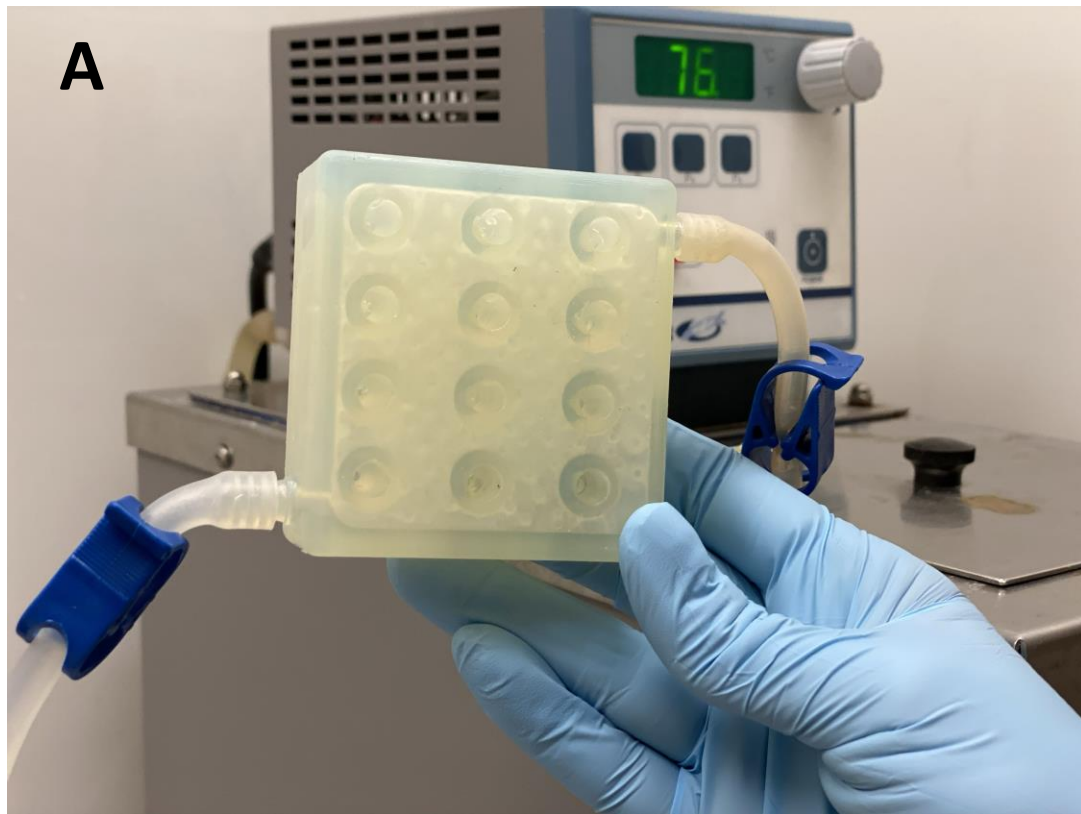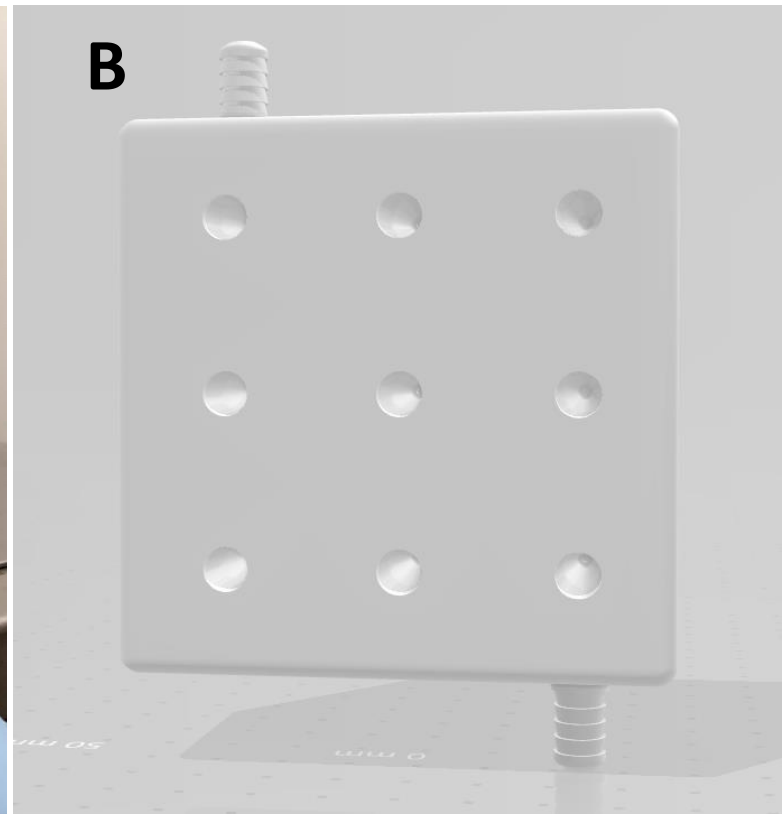

**Supplementary Figure 1**

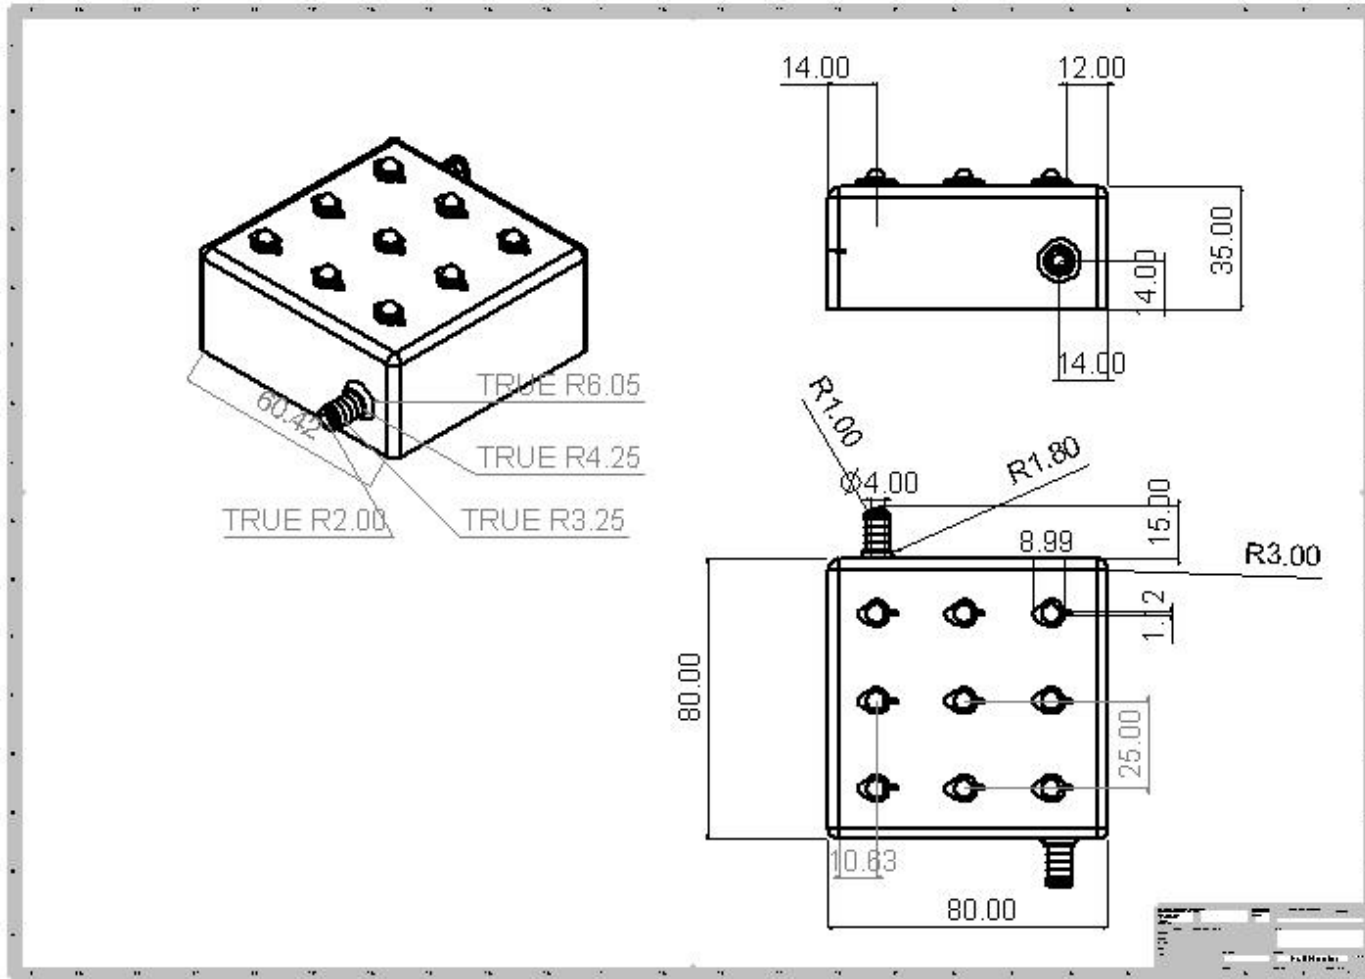

Supplementary Figure 2

**A**

**Set  $\alpha$**

**Set  $\beta$**

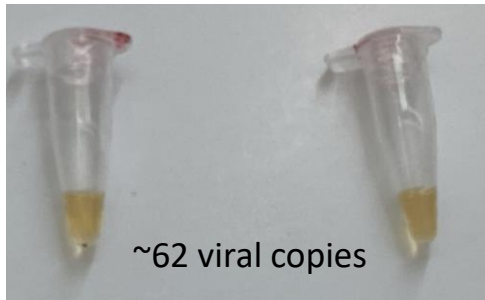

**B**

4 °C

20 °C

negative

positive

positive

Storage time

24

48

72

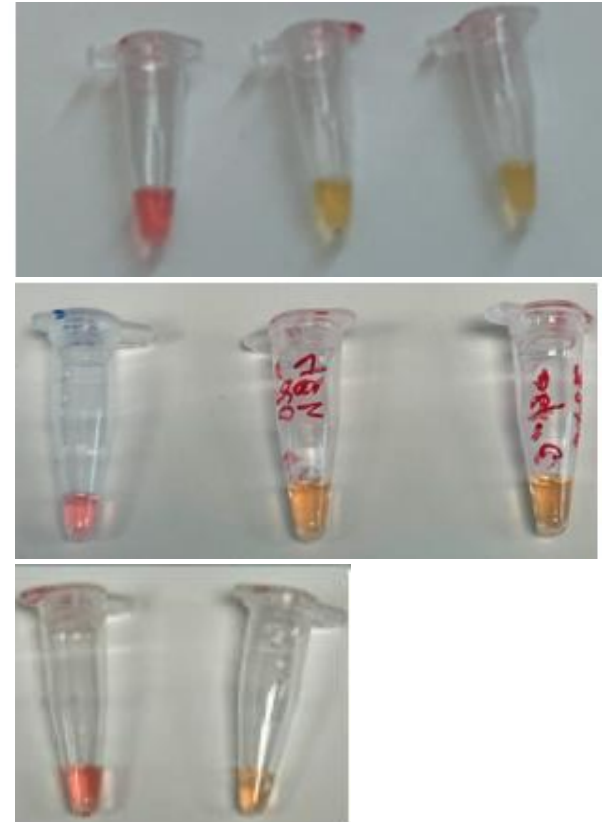

**Supplementary Figure 3**

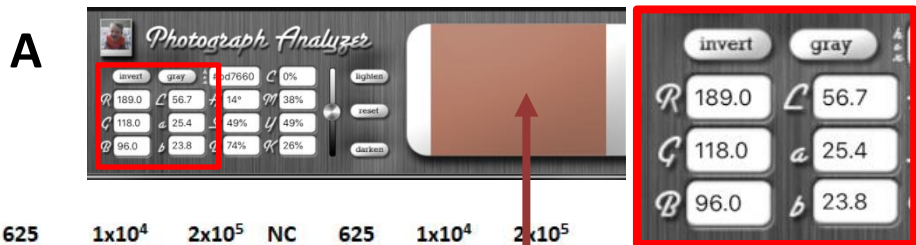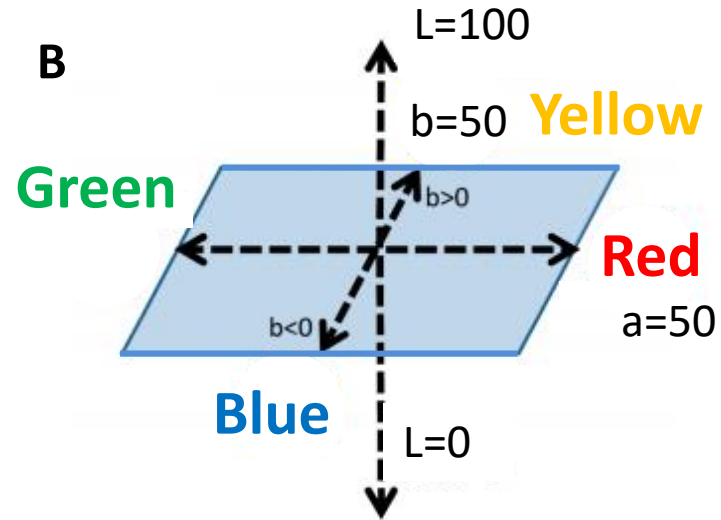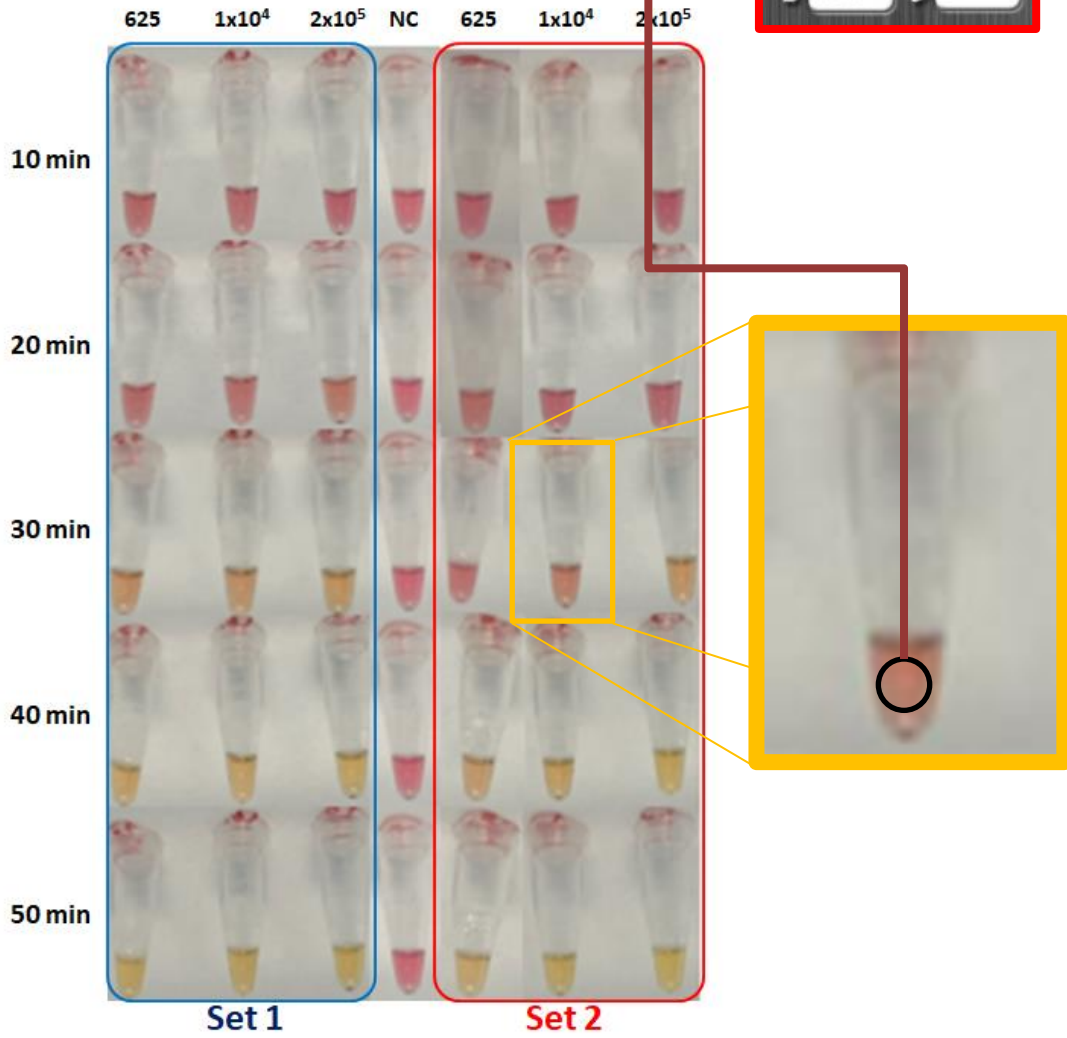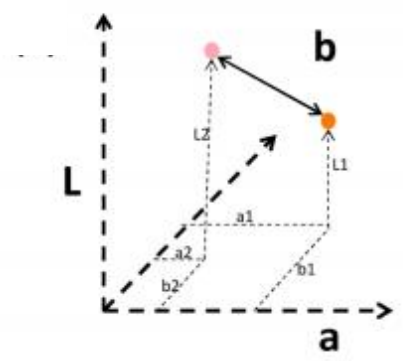

Supplementary Figure 4

**A**

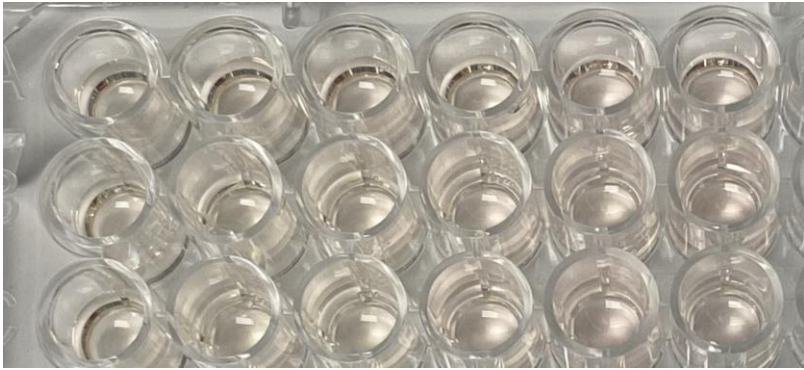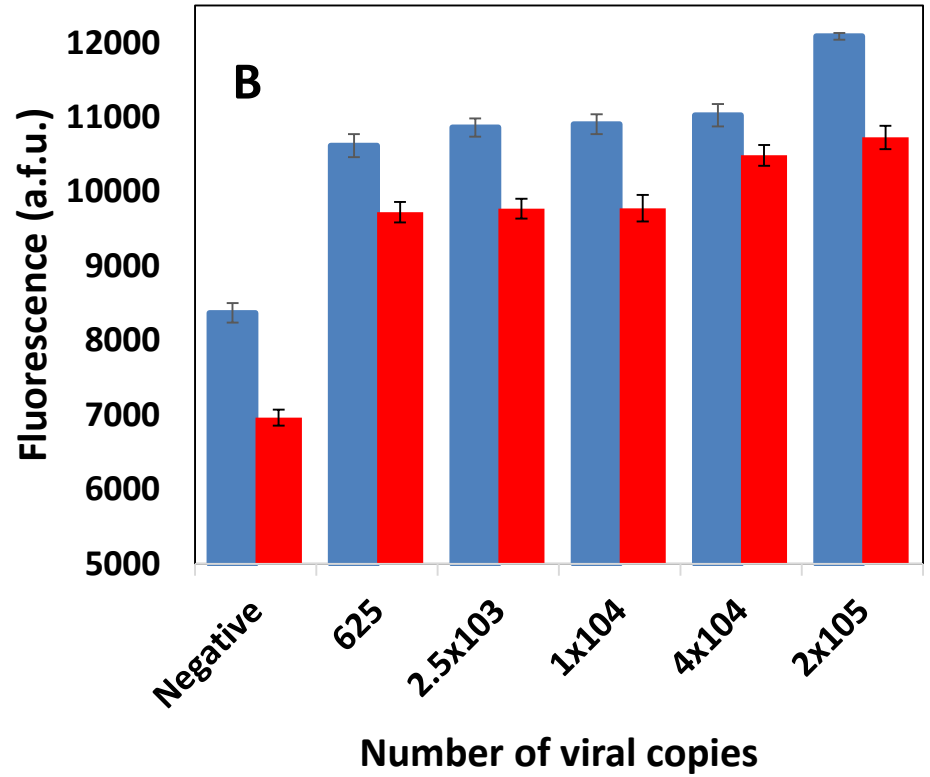

**Supplementary Figure 5**
